# Supplementary material for: The Effects of Alloying Elements Cr, Al, and Si on Oxidation Behaviors of Ni-Based Superalloys
Source: MDPI journal article supplement (doi:10.3390/ma15207352), 2022-10-20
Supplement: s1 [file s1]

## Supplementary Information

for

### The effects of alloying elements Cr, Al, and Si on oxidation behaviors of Ni-based superalloys

Suyu Ma<sup>1,2</sup>, Qingqing Ding<sup>1,\*</sup>, Xiao Wei<sup>1</sup>, Ze Zhang<sup>1</sup>, Hongbin Bei<sup>1,\*</sup>

*1 School of Materials Science and Engineering, Zhejiang University, Hangzhou, 310027, China*

*2 Polytechnic Institute, Zhejiang University, Hangzhou 310027, China;*

\*Corresponding author: qq\_ding@zju.edu.cn (Q. Ding); hbei2018@zju.edu.cn (H. Bei)

This document contains six supplementary figures and one supplementary table.

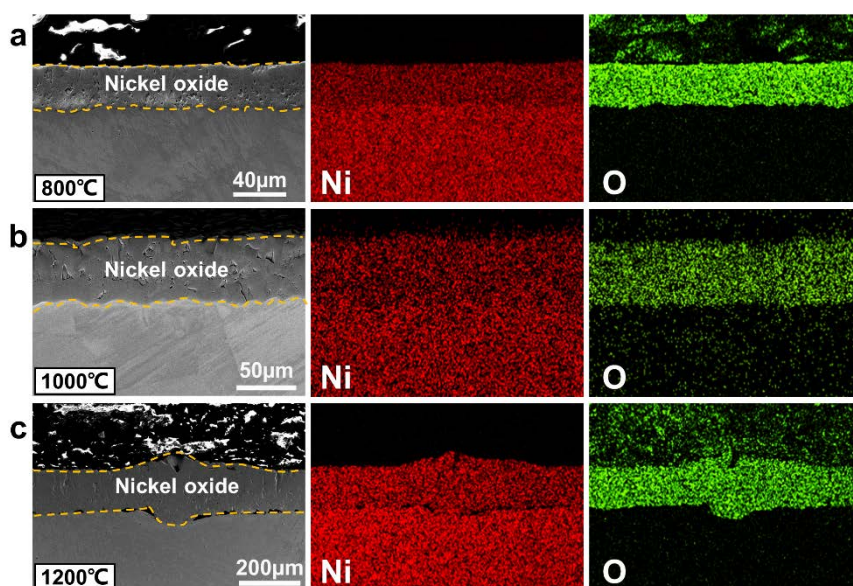

Figure S1. Cross-sectional microstructures (SE images) and EDS maps of oxide scales on Ni oxidized at (a) 800 °C, (b) 1000 °C, and (c) 1200 °C for 576 h.

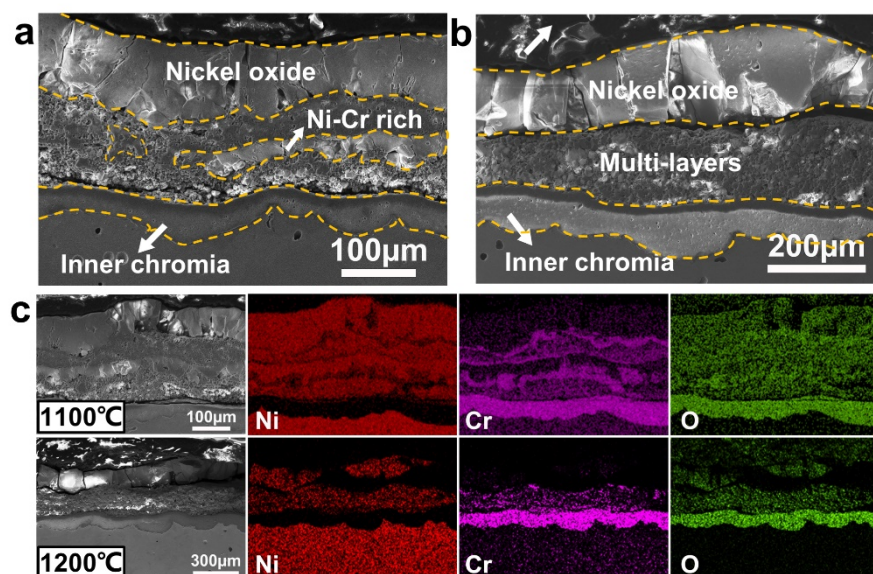

Figure S2. Cross-sectional microstructures (SE images) of oxide scales on Ni-20Cr oxidized at (a) 1100 °C, and (b) 1200 °C for 576 h. (c) EDS maps of oxide scales on Ni-20Cr oxidized at 1100 °C and 1200 °C for 576 h.

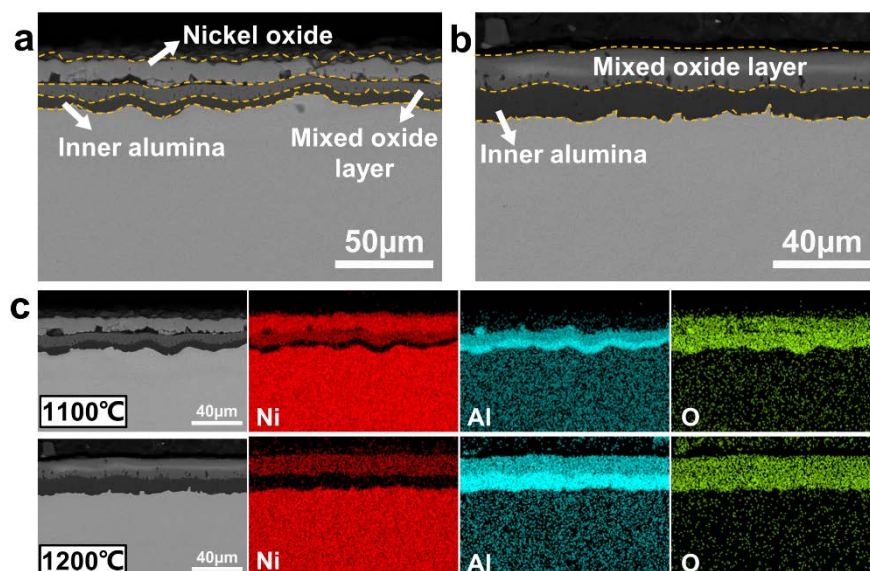

Figure S3. Cross-sectional microstructures (BSE images) of oxide scales on Ni-15Al oxidized at (a) 1100 °C, and (b) 1200 °C for 576 h. (c) EDS maps of oxide scales on Ni-15Al oxidized at 1100 °C and 1200 °C for 576 h.

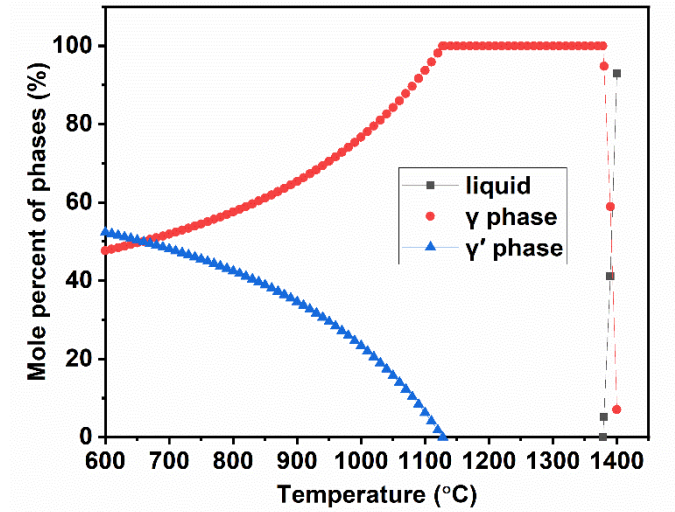

Figure S4. Thermodynamic equilibrium phase diagram of Ni-15Al-2Si calculated by Thermo-Calc software.

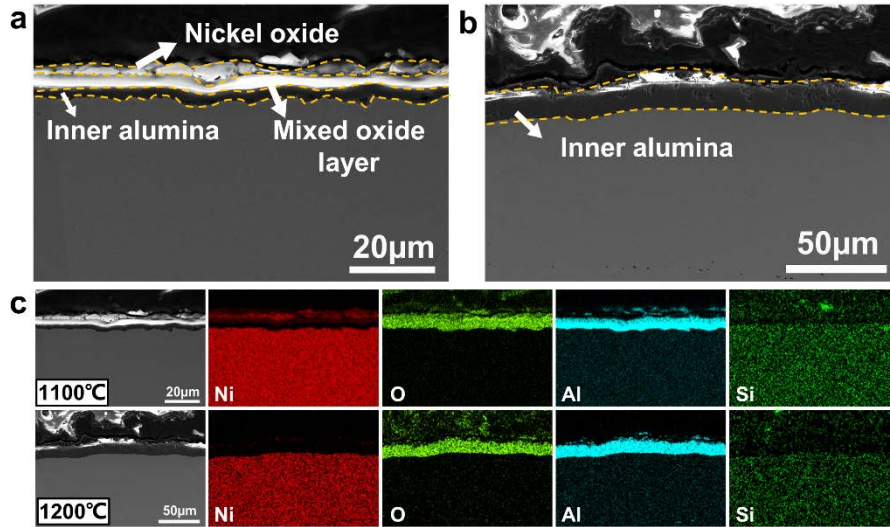

Figure S5. Cross-sectional microstructures (SE images) of oxide scales on Ni-15Al-2Si oxidized at (a) 1100 °C, and (b) 1200 °C for 576 h. (c) EDS maps of oxide scales on Ni-15Al-2Si oxidized at 1100 °C and 1200 °C for 576 h.

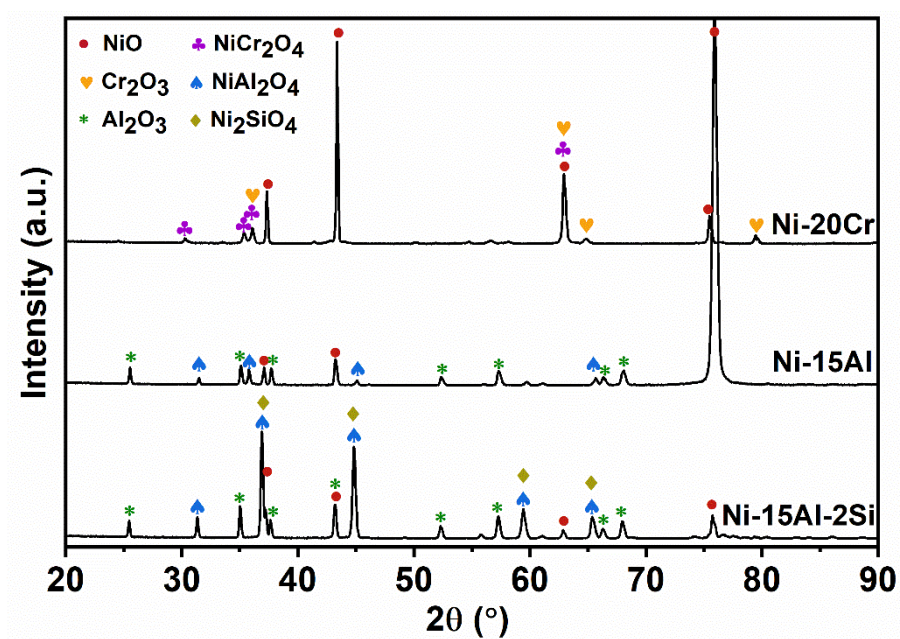

Figure S6. XRD patterns of oxides formed on Ni-20Cr, Ni-15Al, and Ni-15Al-2Si oxidized at 1000 °C for 576 h.

Table S1: Activity of Al in Ni-15Al and Ni-15Al-2Si at temperatures ranging from 700 °C to 1200 °C calculated by the Thermo-Calc software.

| Temperatures | The activity of Al in Ni-15Al | The activity of Al in Ni-15Al-2Si |
|--------------|-------------------------------|-----------------------------------|
| 700 °C       | $1.71 \times 10^{-10}$        | $1.87 \times 10^{-10}$            |
| 800 °C       | $1.07 \times 10^{-9}$         | $1.17 \times 10^{-9}$             |
| 900 °C       | $4.84 \times 10^{-9}$         | $5.34 \times 10^{-9}$             |
| 1000 °C      | $1.44 \times 10^{-8}$         | $1.91 \times 10^{-8}$             |
| 1100 °C      | $3.04 \times 10^{-8}$         | $5.34 \times 10^{-8}$             |
| 1200 °C      | $5.69 \times 10^{-8}$         | $9.58 \times 10^{-8}$             |
